# Supplementary material for: Cytotoxic T lymphocyte antigen-4 expression in esophageal carcinoma: implications for prognosis
Source: PubMed Central journal article supplement (PMC5042006; doi:10.18632/oncotarget.8476), 2016-03-30
Supplement: oncotarget-07-26670-s001.pdf [file oncotarget-07-26670-s001.pdf]

## SUPPLEMENTARY TABLES

**Supplementary Table S1: Clinicopathological features of the 158 patients with esophageal cancer (at the time of initial diagnosis)**

| Clinicopathological parameter | n (%)      |
|-------------------------------|------------|
| Age (years)                   |            |
| ≤55                           | 82 (51.9)  |
| >55                           | 76 (48.1)  |
| Histological grade            |            |
| Well differentiated           | 43 (27.2)  |
| Moderately differentiated     | 75 (47.5)  |
| Poorly differentiated         | 40 (25.3)  |
| Length                        |            |
| <3 cm                         | 11 (7.0)   |
| 3–5cm                         | 82 (51.9)  |
| >5 cm                         | 65 (41.1)  |
| Tumor size                    |            |
| T1                            | 9 (5.7)    |
| T2                            | 39 (24.7)  |
| T3                            | 107 (67.7) |
| T4                            | 3 (1.9)    |
| Lymph node metastasis number  |            |
| N0                            | 86 (54.4)  |
| N1                            | 31 (19.6)  |
| N2                            | 15 (9.5)   |
| N3                            | 9 (5.7)    |
| N4                            | 7 (4.4)    |
| N5                            | 1 (0.6)    |
| N6                            | 3 (1.9)    |
| N7                            | 1 (0.6)    |
| N8                            | 2 (1.3)    |
| N9                            | 2 (1.3)    |
| N10                           | 1 (0.6)    |
| Distant metastasis            |            |
| M0                            | 152 (96.2) |
| M1                            | 6 (3.8)    |
| Clinical stage                |            |
| IA                            | 3 (1.9)    |

(Continued)

| Clinicopathological parameter   | <i>n</i> (%) |
|---------------------------------|--------------|
| IB                              | 5 (3.2)      |
| IIA                             | 43 (27.2)    |
| IIB                             | 46 (29.1)    |
| IIIA                            | 34 (21.5)    |
| IIIB                            | 14 (8.9)     |
| IIIC                            | 7 (4.4)      |
| IV                              | 6 (3.8)      |
| Location                        |              |
| Upper                           | 12 (7.6)     |
| Middle                          | 98 (62.0)    |
| Lower                           | 48 (30.4)    |
| CTLA-4 expression on tumor cell |              |
| Negative                        | 42 (26.6)    |
| Weak                            | 44 (27.8)    |
| Moderate                        | 38(24.1)     |
| Strong                          | 34(21.5)     |
| Extent of TIMCs                 |              |
| Absent                          | 4 (2.5)      |
| Focal                           | 12 (7.6)     |
| Mild                            | 65 (41.1)    |
| Moderate                        | 71 (44.9)    |
| Severe                          | 6 (3.8)      |
| CTLA-4 expression in TIMCs      |              |
| Absent                          | 23 (14.9)    |
| Focal                           | 42 (27.3)    |
| Mild                            | 53 (34.4)    |
| Moderate                        | 20 (13.0)    |
| Severe                          | 16 (10.4)    |

**Supplementary Table S2: Correlation between CTLA-4 expression on tumor cells and the clinicopathological characteristics of the 158 ESCC cases**

| Clinicopathologic variables  | Number of each group | CTLA-4 expression on tumor |      | P-value |
|------------------------------|----------------------|----------------------------|------|---------|
|                              |                      | Low                        | High |         |
| All cases                    | 158                  | 86                         | 72   |         |
| Age (years)                  |                      |                            |      | 0.636   |
| <56                          | 97                   | 52                         | 45   |         |
| ≥56                          | 61                   | 34                         | 27   |         |
| Sex                          |                      |                            |      | 0.488   |
| Male                         | 126                  | 68                         | 58   |         |
| Female                       | 32                   | 18                         | 14   |         |
| Tumor size (cm)              |                      |                            |      | 0.527   |
| <5                           | 63                   | 34                         | 29   |         |
| ≥5                           | 95                   | 52                         | 43   | 0.358   |
| Histological differentiation |                      |                            |      | 0.765   |
| Well                         | 43                   | 24                         | 19   |         |
| Moderate                     | 75                   | 42                         | 33   |         |
| Poor                         | 40                   | 20                         | 20   |         |
| TNM                          |                      |                            |      | 0.361   |
| TNM (1+2)                    | 100                  | 56                         | 44   |         |
| TNM (3+4)                    | 58                   | 30                         | 28   |         |
| Location                     |                      |                            |      | 0.112   |
| Upper                        | 12                   | 10                         | 12   |         |
| Middle                       | 98                   | 51                         | 47   |         |
| Lower                        | 48                   | 25                         | 23   |         |
| Lymphatic metastasis         |                      |                            |      | 0.461   |
| Negative                     | 86                   | 46                         | 40   |         |
| Positive                     | 72                   | 40                         | 32   |         |
| Distant Metastasis           |                      |                            |      | 0.572   |
| No                           | 152                  | 83                         | 69   |         |
| Yes                          | 6                    | 3                          | 3    |         |
| TIL                          |                      |                            |      | 0.11    |
| Absent                       | 4                    | 2                          | 2    |         |
| Focal                        | 77                   | 33                         | 44   |         |
| Moderate                     | 71                   | 47                         | 24   |         |
| Marked                       | 6                    | 4                          | 2    |         |

**Supplementary Table S3: Correlation between CTLA-4 expression in TIMCs and the clinicopathological characteristics of the 154<sup>a</sup> ESCC**

| Clinicopathologic variables  | Number of each group | CTLA-4 expression in TIMCs |          | P-value |
|------------------------------|----------------------|----------------------------|----------|---------|
|                              |                      | negative                   | positive |         |
| All cases                    | 154                  | 65                         | 89       |         |
| Age(years)                   |                      |                            |          | 0.629   |
| <56                          | 79                   | 31                         | 48       |         |
| ≥56                          | 75                   | 34                         | 41       |         |
| Sex                          |                      |                            |          | 0.222   |
| Male                         | 124                  | 53                         | 71       |         |
| Female                       | 30                   | 12                         | 18       |         |
| Tumor size (cm)              |                      |                            |          | 0.742   |
| <5                           | 62                   | 20                         | 42       |         |
| ≥5                           | 92                   | 45                         | 47       | 0.358   |
| Histological differentiation |                      |                            |          | 0.847   |
| Well                         | 43                   | 20                         | 23       |         |
| Moderate                     | 73                   | 28                         | 45       |         |
| Poor                         | 38                   | 17                         | 21       |         |
| TNM                          |                      |                            |          | 0.180   |
| TNM (1+2)                    | 98                   | 41                         | 57       |         |
| TNM (3+4)                    | 56                   | 24                         | 32       |         |
| Location                     |                      |                            |          | 0.096   |
| Upper                        | 12                   | 7                          | 5        |         |
| Middle                       | 95                   | 39                         | 56       |         |
| Lower                        | 47                   | 19                         | 28       |         |
| Lymphatic metastasis         |                      |                            |          | 0.332   |
| Negative                     | 84                   | 45                         | 39       |         |
| Positive                     | 70                   | 20                         | 50       |         |
| Distant Metastasis           |                      |                            |          | 0.405   |
| No                           | 148                  | 61                         | 87       |         |
| Yes                          | 6                    | 4                          | 2        |         |
| TIMCs <sup>a</sup>           |                      |                            |          | 0.08    |
| Focal                        | 77                   | 39                         | 38       |         |
| Moderate                     | 71                   | 23                         | 48       |         |
| Marked                       | 6                    | 3                          | 3        |         |

Supplementary Table S4: Correlation between CTLA-4 expression profile and the clinicopathological characteristics of the 154<sup>+</sup>ESCC

| Clinicopathologic variables  | Number of each group | CTLA-4 expression profile |             | P-value |
|------------------------------|----------------------|---------------------------|-------------|---------|
|                              |                      | FCEP Group                | Other group |         |
| All cases                    | 154                  | 49                        | 105         |         |
| Age(years)                   |                      |                           |             | 0.747   |
| <56                          | 94                   | 29                        | 65          |         |
| ≥56                          | 60                   | 20                        | 40          |         |
| Sex                          |                      |                           |             | 0.500   |
| Male                         | 124                  | 41                        | 83          |         |
| Female                       | 30                   | 8                         | 22          |         |
| Tumor size (cm)              |                      |                           |             | 0.923   |
| <5                           | 62                   | 20                        | 42          |         |
| ≥5                           | 92                   | 29                        | 63          | 0.358   |
| Histological differentiation |                      |                           |             | 0.926   |
| Well                         | 43                   | 13                        | 30          |         |
| Moderate                     | 73                   | 23                        | 50          |         |
| Poor                         | 38                   | 13                        | 25          |         |
| TNM                          |                      |                           |             | 0.513   |
| TNM (1+2)                    | 98                   | 33                        | 65          |         |
| TNM (3+4)                    | 56                   | 16                        | 40          |         |
| Location                     |                      |                           |             | 0.212   |
| Upper                        | 12                   | 6                         | 6           |         |
| Middle                       | 95                   | 26                        | 69          |         |
| Lower                        | 47                   | 17                        | 30          |         |
| Lymphatic metastasis         |                      |                           |             | 0.801   |
| Negative                     | 84                   | 26                        | 58          |         |
| Positive                     | 70                   | 23                        | 47          |         |
| Distant Metastasis           |                      |                           |             | 0.329   |
| No                           | 148                  | 46                        | 102         |         |
| Yes                          | 6                    | 3                         | 3           |         |
